# Supplementary material for: Sublethal Photothermal Stimulation with a Micropulse Laser Induces Heat Shock Protein Expression in ARPE-19 Cells
Source: J Ophthalmol. 2015 Nov 30;2015:729792. doi: 10.1155/2015/729792 (PMC4677213; doi:10.1155/2015/729792)
Supplement: Supplementary file 1 — Spots were made using the continuous-wave mode with a power of 250 mW, duration of 500 ms, and spot size of 200 μm. ARPE-19 cells are gradually changing ring-shaped form in periphery area of irradiate sites 2 hours after the ablation. [file 729792.f1.zip]

Archive with 2 entries (1 files):
- 729792.f1/
- 729792.f1/mat.729792.v2.mov
